# Supplementary material
Source: PubMed Central journal article supplement (PMC3201659)

**A**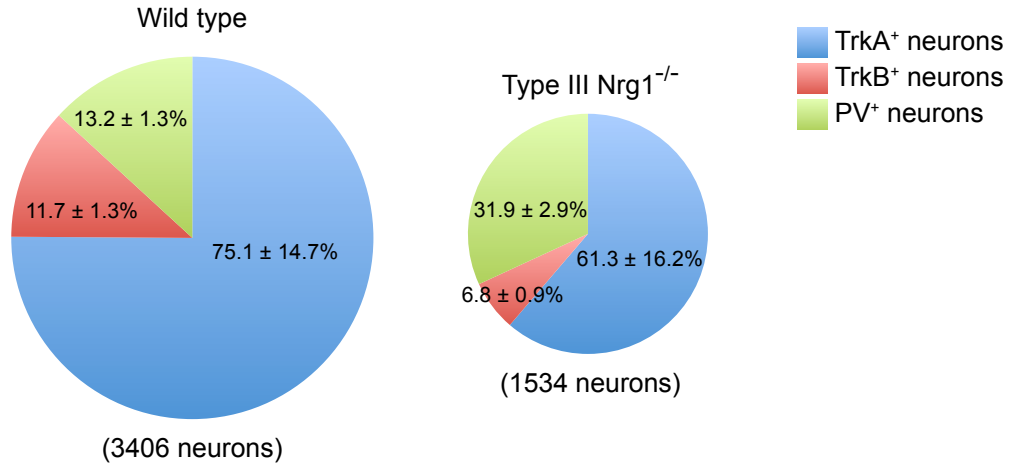**B**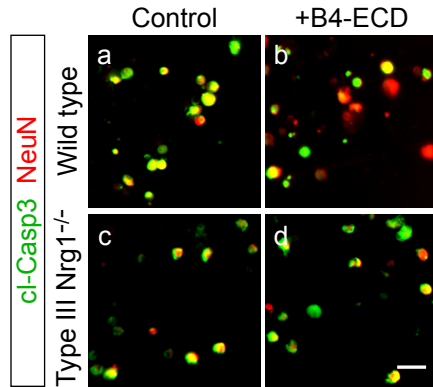**C**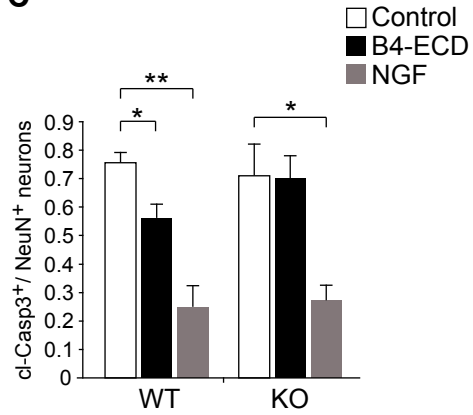

Supplement: supp_138.22.4887_DEV072306FigS2.pdf [file supp_138.22.4887_DEV072306FigS2.pdf]

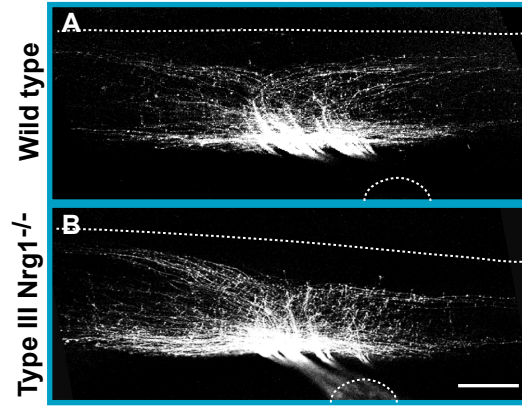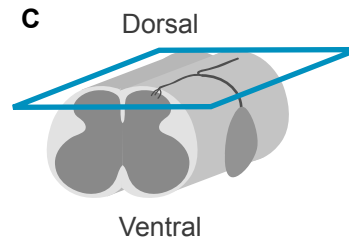

Supplement: supp_138.22.4887_DEV072306FigS3.pdf [file supp_138.22.4887_DEV072306FigS3.pdf]

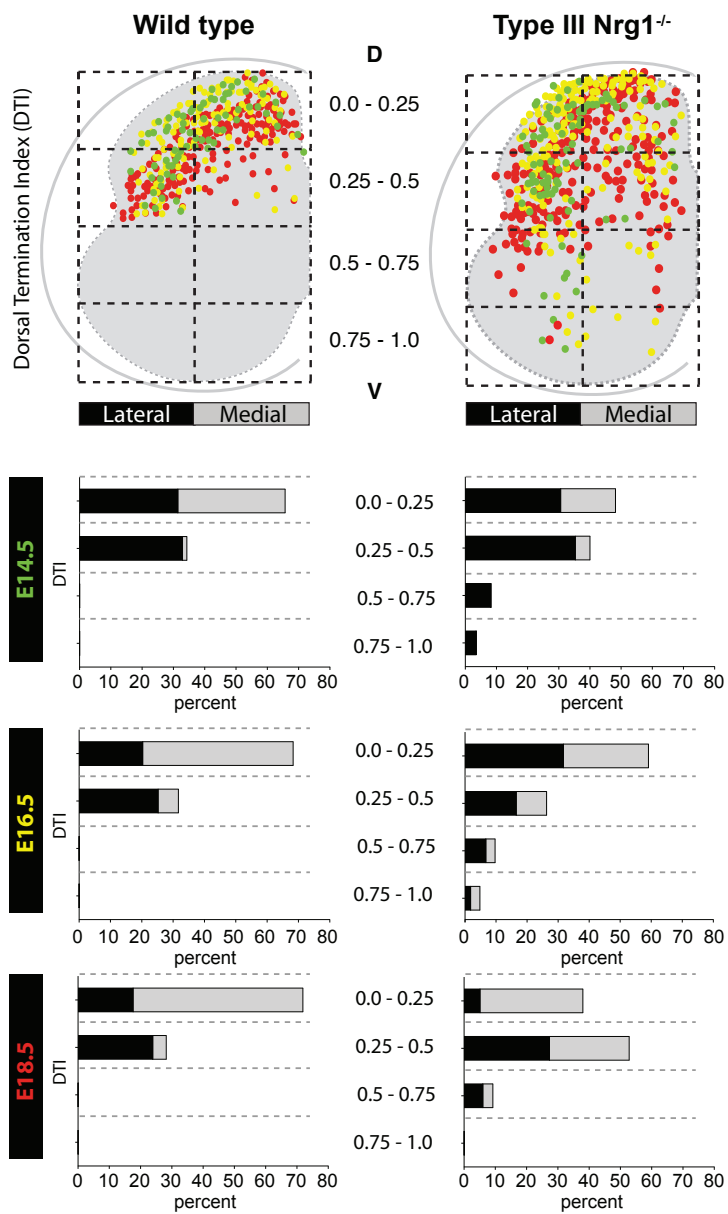

Supplement: supp_138.22.4887_DEV072306FigS4.pdf [file supp_138.22.4887_DEV072306FigS4.pdf]

Peripherin

E14.5

E16.5

E18.5

Wild type

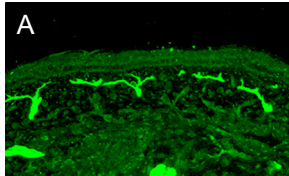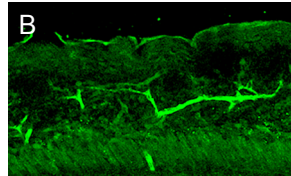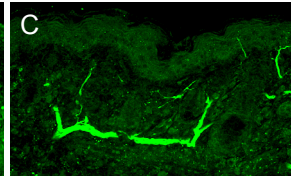

Type III Nrg1<sup>-/-</sup>

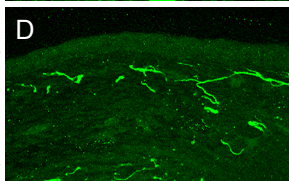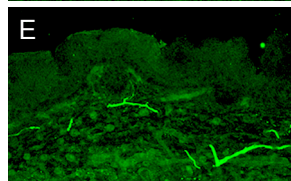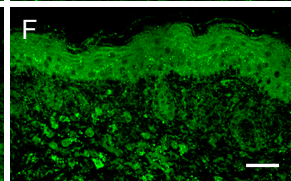

Supplement: supp_138.22.4887_DEV072306FigS5.pdf [file supp_138.22.4887_DEV072306FigS5.pdf]

Substance P

E17.5

E18.5

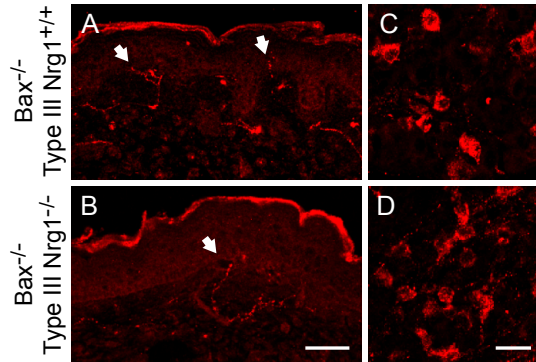

Supplement: supp_138.22.4887_DEV072306FigS6.pdf [file supp_138.22.4887_DEV072306FigS6.pdf]
